**Version 3 (26-08-2020):** this manuscript is a non-peer reviewed preprint shared via the BiorXiv server while being considered for publication in a peer-reviewed academic journal. Please refer to the permanent digital object identifier (<https://doi.org/10.1101/2020.08.11.246058>).

**Under the Creative Commons license ([CC-BY Attribution-NonCommercial-NoDerivatives 4.0 International](#))** you are free to share the material as long as the authors are credited, you link to the license, and indicate if any changes have been made. You may not share the work in any way that suggests the licensor endorses you or your use. You cannot change the work in any way or use it commercially.

# How widespread was the Tapanuli orangutan and what led to its decline?

Erik Meijaard<sup>1,2,3,\*</sup>, Safwanah Ni'matullah<sup>1</sup>, Rona Dennis<sup>1</sup>, Julie Sherman<sup>1,4</sup>, Onrizal<sup>5</sup> and Serge A. Wich<sup>6</sup>

<sup>1</sup> Borneo Futures, Bandar Seri Begawan, Brunei Darussalam

<sup>2</sup> Durrell Institute of Conservation and Ecology, University of Kent, Canterbury, UK

<sup>3</sup> School of Biological Sciences, University of Queensland, St Lucia, Australia

<sup>4</sup> Wildlife Impact. PO Box 31062, Portland, Oregon, USA

<sup>5</sup> University of Sumatera Utara, Medan, Indonesia

<sup>6</sup> Liverpool John Moores University, Liverpool, UK

\* Corresponding author

E-mail: [emeijaard@gmail.com](mailto:emeijaard@gmail.com)

## Abstract

The Tapanuli orangutan (*Pongo tapanuliensis*) is the most threatened great ape species in the world. It is restricted to an area of about 1,000 km<sup>2</sup> of mostly hill forest where fewer than 800 animals survive in three declining subpopulations. Through a historical ecology approach involving analysis of colonial-era and other literature, we demonstrate that historically the Tapanuli orangutan lived in a much larger area, and across a much wider range of habitat types compared to now. Its current range is about 10-20% of the range it had some 150-200 years ago. A combination of historic fragmentation of forest habitats, mostly for small-scale agriculture, and unsustainable hunting likely drove various populations to the south, east and west of the current population to extinction prior to the industrial-scale forest conversion that started in the 1970s. Our findings indicate how sensitive orangutans are to the combined effects of habitat fragmentation and unsustainable mortality or rescue and translocation rates. Saving this species will

require prevention of any further fragmentation and any killings or other removal of animals from the remaining population. Without concerted action to achieve this, the remaining populations of Tapanuli orangutan are doomed to become extinct within several orangutan generations.

## Introduction

Determining the key drivers of population decline is a primary objective in conservation biology and wildlife management. Many wildlife species are threatened by a range of different and often interacting factors, and developing effective conservation strategies requires unravelling how these threats interact [1]. This is rarely easy, because species operate in complex socio-ecological systems in which different components are affected by a range of anthropomorphic factors such as habitat loss and fragmentation or unsustainable harvest. Evidence-based conservation seeks to address this by quantifying the relationships between conservation actions, change in threat severity and change in conservation status [2, 3]. Collecting evidence is, however, time-consuming, and when conservation problems are “wicked”, i.e., the problems change as solutions are found [4], a stable solution may not be found to a particular conservation problem [5]. This often means that scientific evidence does not support clear-cut conclusions in value-driven debates that characterize conservation [6]. Nevertheless, conservation advocates often seek simple narratives to convince the public of the urgency of environmental problems and the need to support it. A good example is the polarized debate around oil palm (*Elaeis guineensis*) and orangutans (*Pongo* sp.) where both proponents and opponents of oil palm cherry-pick facts to drive home particular messages, i.e., oil palm is either the greatest evil destroyer of tropical rainforests or a blessing to impoverished rural communities in tropical countries [7]. A similarly polarized debate currently rages between opponents and proponents of a hydropower project in the range of the Tapanuli orangutan (*Pongo tapanuliensis*), an endemic great ape of the Indonesian island of Sumatra [8] (Fig 1).

One way to bring more clarity in muddled or polarized debates is to be more specific about the system in which a particular problem plays out. For example, if the system boundaries are limited to oil palm as an ecological threat to orangutan survival [9], a simple solution would be to ban palm oil use and to stop its production, preventing further deforestation. If the system boundaries are extended to include smallholder farmers who produce palm oil for their own needs as well as international markets, a ban on palm oil would encompass broader ethical connotations as it would affect people’s livelihoods [7]. The use of different perspectives in complex conservation contexts may not make it easier to solve them but can provide helpful insights about the boundaries of a particular problem. Are they, for example, mostly ecological, or do they involve human threats, such as hunting, or societal ethics? One such perspective is history. Looking back in time on the development of a particular problem may provide insights about the underlying drivers of that problem. The historical ecology approach builds on this approach by using historical knowledge in the management of ecosystems or species [10]. Referring to historical evidence has, for example, provided valuable understanding about the ecology of orangutans and what likely caused their decline during the Late Pleistocene and Holocene, which informs their management today [11]. Here we apply an analysis of historical ecology to one particular species of orangutan, the Tapanuli Orangutan, by analysing rarely used colonial-era literature to better understand the historic distribution of the species. Indonesia’s colonial literature on natural history was mostly written in Dutch and German, and is not commonly used by conservation scientists working in Indonesia.

The Tapanuli Orangutan was described in 2017 as a third species of orangutan [12], 20 years after this orangutan population was formally reported to modern science [13]. The species is restricted to three areas of mostly upland forest in the Batang Toru area in North Sumatra (Fig 1), totalling approximately 1,023 km<sup>2</sup> [14, 15]. This orangutan population had been largely overlooked by science, despite having been tentatively described in the colonial literature [16]. The estimated total number of wild Tapanuli

78 Orangutans is currently 767 [95%: 213-1,597, 14] making this the great ape species with the lowest  
79 number of individuals in the wild and perhaps the most threatened in the world [8].

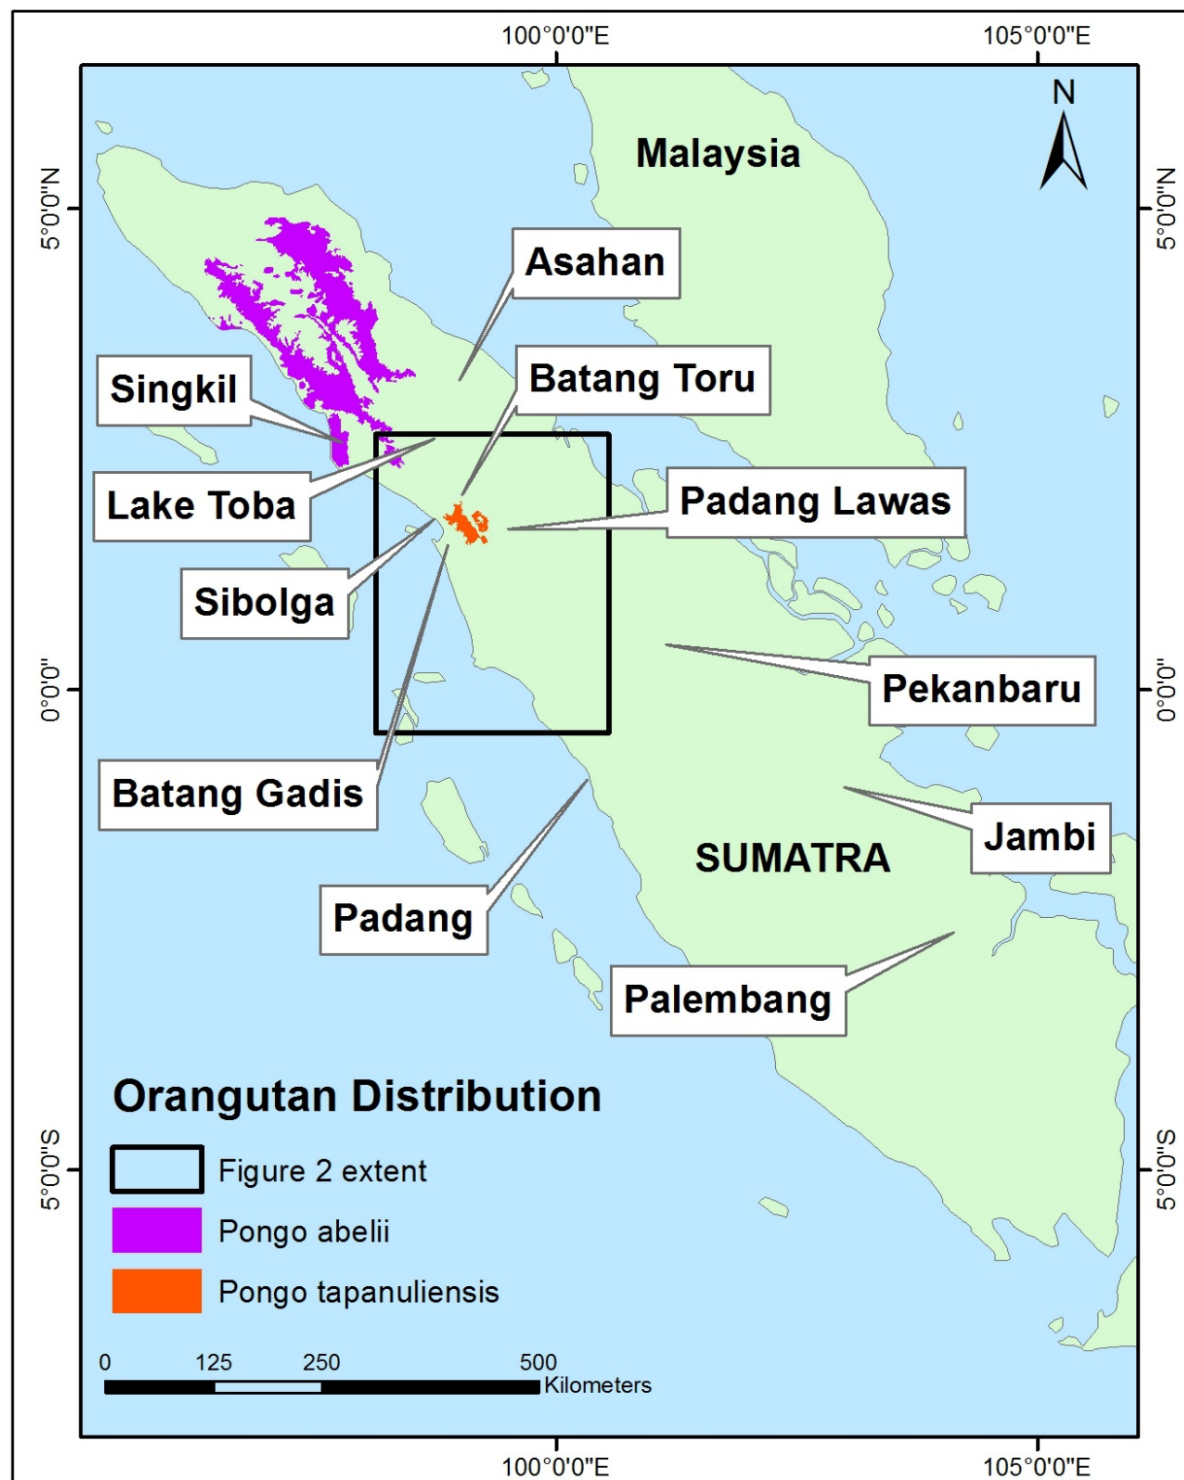

80  
81 **Fig 1. Map of the island of Sumatra, showing the distribution ranges of *P. tapanuliensis* and *P.***  
82 ***abelii*, and the main locations (cities, districts and other geographic features) mentioned in the text.**  
83 **The inset shows the area of Fig 2.**

The species is currently under threat from habitat loss for agriculture, hunting and conflict killing, and development in the area, for infrastructure, gold mining, and geothermal and hydro-energy, which threaten to further reduce and fragment remaining habitat, reduce dispersal opportunities for the orangutans between subpopulations, and undermine population viability through unsustainable mortality rates [14, 17-20]. Due to its restricted current distribution mostly centred around higher elevations (834.4±219.3m asl) compared to 701.7±454.8 m asl for the Sumatran orangutan (*P. abelii*) and 170.6±187.0 m asl for the Bornean orangutan (*P. pygmaeus*) [21], it has been argued that the individuals of the species have adapted specifically to the uplands that cover most of its current distribution [17]. What is not clear is whether the currently existing altitudinal differences between these orangutan species are the result of ecological specializations to highland ecological conditions, or whether the highland species now occur at higher altitudes because their previous lowland habitats no longer exist or because the species became extinct there. The fossil record for Sumatran orangutans confirms that the genus *Pongo* was once more widespread. Extensive remains from the Late Pleistocene and Holocene have been excavated from a range of caves in the Padang Highlands, some 300 km south of the current range [22] (Fig 1). Why the species disappeared from that part of Sumatra remains unclear but unsustainable hunting is one of the possible explanations, because until recently large areas of suitable forest habitat remained in areas where orangutans are now extinct [23]. Given that, in the past, forest cover was also much more widespread in the range of the Tapanuli Orangutan, it is important to determine whether historically (ca. past 500 years) orangutans did occur in those areas. This would help establish whether the Tapanuli orangutan has indeed evolved to only live in the highlands and estimate what its past distribution could have been.

The aim of this paper is to compile reports of orangutans occurring to the south of the Toba lake (Fig 1) with the focus on determining how reliable these are, and, where feasible, provide a location for the occurrence of orangutans to assess whether these are predominantly highland sites, and to assess which factors could have led to their disappearance in those areas.

## Methods

We compiled records of orangutans from historic sources by searching natural history books, scientific papers, and historic newspapers from before 1940. We searched databases with location specific keywords such as Sumatra, Batang Toeroe, and Tapanoei, using Dutch spelling. We combined this with searches for terms specifically referring to orangutans: Orang oetan, orang-oetan, orangutan, and also mawas, mias and maias (local names for orangutan commonly used in historic literature), using a variety of spellings. For the period since 1940, we used the sources from the review in Rijksen and Meijaard [23] as well as scientific papers and personal communications. To determine the locations of the historic sightings or captures we consulted the online Leiden University Library colonial map repository (<http://maps.library.leiden.edu/apps/s7>). In some cases, rivers or villages were indicated which made it feasible to estimate the location of the sightings quite accurately. In other cases, the area of the sighting or captures was indicated in a broader area which reduced accuracy (tens of kilometers).

We assessed the likely vegetation types that Tapanuli Orangutans would have occurred in, and determined the altitude at which they were reported from the global SRTM layer (30m accuracy). For this, we digitized the first official forest cover map of Indonesia [24], which is likely based on maps produced by the Netherlands-Indies cartographic service from the 1930s and 1940s. We carried out the digitization of the 1950 Indonesia forest cover map using ArcScan extension in ArcGIS. ArcScan is an extension in ArcGIS that converts scanned raster images into vector-based GIS layers [25]. Prior to digitization, the Indonesia forest cover map was georeferenced. This is because scanned raster maps mostly do not contain spatial reference information. Georeferencing helps to assign the coordinate systems of the map and output of ArcScan. Digitization of raster map via ArcScan resulted in polylines.

These polylines were useful in constructing vegetation polygons of the area of interest. Therefore, it is important to clear any unrelated polylines generated in the ArcScan output to ensure polygons could be properly identified and constructed. We completed the construction of polygons using advance editing tool in ArcGIS. This tool closed and converted polylines into polygons. Polygons constructed represent different vegetation types in the area. We then classified the polygons in accordance to their vegetation type with reference to the Indonesia forest cover map. Before vegetation types assignment, we ensured that different vegetation types were represented with separate polygons.

The exact location of the historic orangutan sightings cannot be determined with certainty but the descriptions often provide sufficient detail through names of rivers and villages to estimate the location on a map. Due to this uncertainty the altitude was extracted as a range for some locations. Altitude was determined from the altitude layer in Google Earth Pro. We used the vegetation map for Sumatra [26] in combination with knowledge gained by co-author SW during surveys in the region to assign one of the forest categories to an estimated historic location.

## Results

### Historic accounts

We report the various historic accounts of orangutan sightings or specimens from outside the currently known range in chronological order, starting with Schlegel and Mueller [27] who reported on two orangutan crania that were obtained by a military doctor in the surroundings of Jambi, some 650 km south-east of the current closest orangutan population. It is unclear whether these animals were obtained in Jambi from the wild or whether they were in captivity and possibly originated from northern Sumatra. Schlegel and Mueller reported that the two skulls were housed in the “Rijks-Museum”, which presumably refers to the Leiden Museum of Natural History. Furthermore, they wrote that on the west coast of Sumatra, especially north of the equator, the orangutan was known by the name *mawej*, although in areas further south such as Indrapura and Bengkulu, the names *orang-panda* or *orang-pandak* were used. Co-author Onrizal, remembers growing up east of Padang (Sungai Dareh) listening to stories about *orang-pendek*, human-like creatures living in the forest, which reportedly ceased to exist in the area in the 1970s. Stories of such *orang-pendek* [or other names, such as sedapa, orang lètje or orang segagang, see 28] abound in other parts of southern Sumatra and there has been speculation for over a century that these could be remnant orangutan populations [29-32], although firm evidence remains lacking. For the purpose of the current paper we do not focus on the *orang-pendek* narratives.

Schlegel and Mueller [27] acknowledged that the orangutan was especially common in the north-east of Sumatra, but that occasionally they were encountered further south and along the western shores of Sumatra. Also, the species had been reported from Indrapura (in present-day Riau Province) and near Padang (in West Sumatra, Fig 1), although the descriptions by Schlegel and Müller are insufficient to confirm that these reports referred to orangutans. Earlier writings by Müller [33], however, clarify this, as he refers to “orang-oetan” which locals named “mawej” that one could occasionally encounter in the extensive forests and swamp forests in, what is now, Kampar Regency, roughly between the towns of Salo and Gunung Sahilan (no. 1 in Fig 2).

In further description of their travels across Sumatra, Müller and Horner [34] wrote that orangutans were not unknown in the Tapanuli area and especially common in “Taroemon”, i.e., present-day Trumon in the Singkil area (Fig 1), which is part of the *Pongo abelii* range. They report that people distinguished between two types of orangutans, the *maweh baroet* (baroet meaning monkey in the local language) and



*maweh orang* (the ‘human’ orangutan). Ludeking [35], in his descriptions of West Sumatra, mentions a record of a 6 feet tall, upright primate, possibly an adult male orangutan, that his informants had seen on *Bukit Gedang*, which is close to present-day Bonjol (no. 2 in Fig 2). A decade later, Von Rosenberg [36] did not provide much detail but similarly mentioned that orangutans were present north of “Tapanoeli” (what is now Sibolga) to Singkil, indicating presence of the species in the coastal lowlands west of Lake Toba (no. 3 in Fig 2). He saw two orangutans but did not clarify where he saw them.

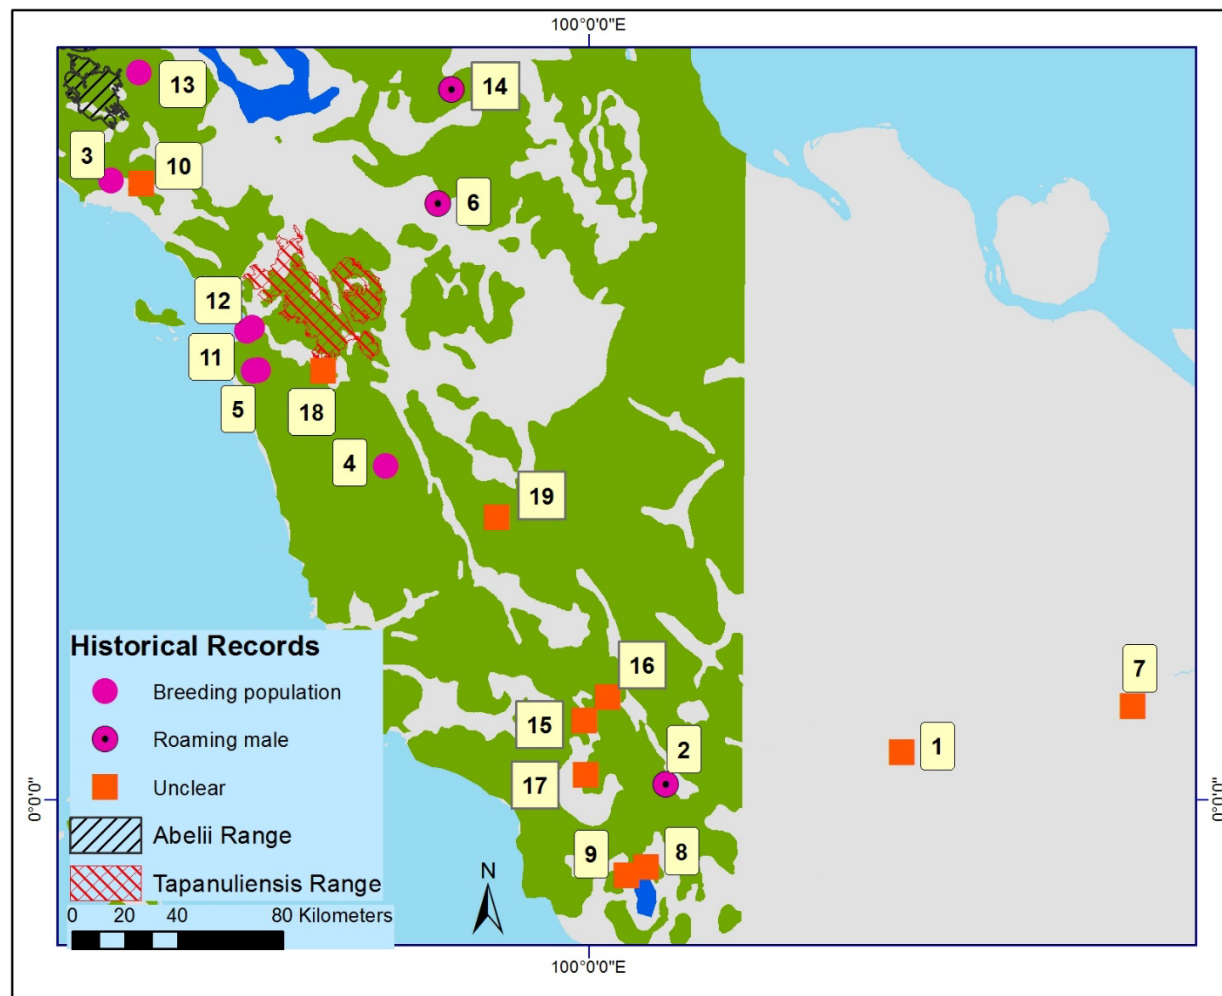

**Fig 2. Map showing points where orangutans were historically reported and the forest cover in 1950 before large-scale commercial forest exploitation began. (updated map for eastern remains pending)**

Kramm [37] reported on a hunting expedition near "Soeroe Mantinggi", where he found several orangutans and observed them for several hours. The location likely referred to Sayur Matinggi (no. 4 in Fig 2), which is currently located in the Batang Gadis area, some 50 km south of the current range of *P. tapanuliensis*. Kramm mentioned that Soeroe Mantinggi is located at a distance of 22 “*palen*” from Padang Sidempoean. A “*paal*” was a measurement used in the Netherlands-Indies, equalling 1852 m on Sumatra, indicating a distance of about 40 km for 22 “*palen*”. Sayur Matinggi is currently located some 26 km from Padangsidempuan as the crow flies which indicates that indeed this is likely to be the location where Kramm observed orangutans. Kramm was familiar with orangutans which he reported to have also encountered in "Loemoet" and "Batang-Taro". We believe that the former refers to Lumut (no. 5 in Fig

2), just south of Sibolga, and that Batang-Taro is an older name for the Batang Toru area, where *P. tapanuliensis* occurs until today.

Orangutans also seem to have occurred northeast of the current range of the Tapanuli Orangutan. Neumann [38] described the species from “Hadjoran”, which was located in the watershed of the “Batang Si Ombal” and “Aek Hiloeng”, and for which the following coordinates were given: N 2°1’25” and E 99°29’, in the current district of Padang Lawas (Fig 1, no. 6 in Fig 2). This is about 50 km northeast of the most eastern current range of Tapanuli Orangutan. The detailed description, however, suggests that the species was very rare there, and the people of “Hadjoran” had not seen the orangutan there before. The animal was shot, with descriptions of the local people suggesting it was at least 1 m tall, possibly indicating an adult male, which are known to roam far from breeding populations. Neumann writes that he travelled extensively through forest areas in the Padang Lawas area searching for orangutans but never managed to encounter one.

An interesting reference to orangutans, as far south-east as Pelalawan is provided by Twiss [39] who describes a record reported in the Tijdschrift van het binnenlandsch bestuur, Vol. III, p. 138 by mr “L.H.” [40], who was on a trip to *Poeloe Lawan* (Pelelawan) near the confluence of the Batang Nilo and Kampar Rivers (no. 7 in Fig. 1) in 1888, and had an orangutan in his visor, but decided not to shoot it as he had nothing on him to prepare the skin. Twiss [39] reports that L.H. was familiar with orangutans from ones he had seen on Borneo, so the chance of a mistaken identification are small. Twiss also reports that 18 to 20 years prior to his writings (i.e., around 1870), an orangutan was shot in the mountains around Lake Maninjau (no. 8 in Fig. 1), while older people remember seeing orangutans, albeit very rarely, in forests on Bukit Silajang (no. 9 in Fig. 1), a mountain near Lubuk Basung [39].

Hagen [41, p. 66] stated that orangutans were known from the west coast between Tapanuli and Singkil (no. 10 in Fig 2), although Singkil is in the range of *Pongo abelii* and it is not clear whether the coastal Tapanuli reference referred to the area of the current range of *P. tapanuliensis*, or whether it referred to what is now the Central Tapanuli District which extends to the southern part of Singkil, west of Lake Toba. Interestingly, he referred to an orangutan from the interior of Padang (in reference to an article by S. Jentink, Aardrijkskundig Weekblad, 1881, No. 44, p. 287 – not seen by the authors), in west Sumatra that ended up in the Rotterdam Zoo where it died of a bone deformation disease (the skull is kept in the Natural History museum in Leiden, the Netherlands: RMNH.MAM.544).

Miller [42, p. 483] in his account about the mammals collected by W.L. Abbott on the west coast of Sumatra in 1901 and 1902 mentioned the following about orangutans: “The orang utan exists, but not abundantly, about Tapanuli Bay. Two miles up the Jaga Jaga River (no. 11 in Fig 2) some nibong palms were seen that had been broken off by oranges, and also an old sarong (shelter), but the traces were old. There were said to be more a few miles farther inland, particularly up the Berdiri River (no. 12 in Fig 2). The natives say they always go about in pairs.” Miller described the Jaga Jaga River as “a stream near the south end of the Tapanuli or Sibolga Bay”. We located the Berdiri River on an old map under the name “Bardari River”, and we located “Djaga Djaga” as well. It seems clear from this that orangutans occurred in the area inland from the southern part of Sibolga Bay (Fig 1) where there are currently no longer any orangutans.

Beccari [43] reported orangutans around Rambung, in the Tapanuli region, and in the hinterland of Sibolga, where he collected a specimen. We were unable to determine the location of Rambung but there is a Rambong north of the Singkil area, and thus well in *P. abelii* range. The hinterland of Sibolga could either refer to the current *P. tapanuliensis* population or the historic range. He further stated that “In the Zoological Museum at Florence is the skeleton of a young orang-utan, described as coming from Palembang (Fig 1), on the east coast of Sumatra”, some 800 km southeast of the nearest current orangutan population. We contacted the curator of the Florence museum, who wrote in response that the specimen

was indeed present under specimen number MZUF-12: “The specimen was purchased in 1889 in London (G.A. Frank, 9 Haverstock Hill, London). It is a subadult male. The place of origin is Palembang, but may have been captured elsewhere. There are no manifest connections with O. Beccari.” Gustav Adolf Frank was a well-known natural history trader based in Amsterdam and London, and he probably had a good network of local suppliers. Description of the skeleton is provided by Agnelli, Becchi [44] is inconclusive as to what species it belongs to. We can therefore not know for sure whether the animal was caught near Palembang and transported to Europe from there, or whether it originated from northern Sumatra (either of the two known species).

Volz [45] wrote about the distribution of orangutans on Sumatra, although it is not clear to what extent the information is informed by Volz’ own surveys or interpretation of secondary information. Volz suggested that there were no orangutans east of the Langkat River, which he thought was likely the remnant of a large bay or sea connection that once separated north and south Sumatra approximately in a line from Sibolga to north of Medan. He expanded on this in his work a few years later [46], in which he also described additional orangutan sightings. This included a sighting in the upland area west of Lake Toba at an elevation of 1,400 m asl (no. 13 in Fig 2). Referring to the same area, Kohler [47] described a visit to Sibolga where the guest had a young orangutan which had also been caught in the forest on the west of the Toba lake, indicating a breeding population there. Volz [45] also described a sighting of an orangutan east of Lake Toba in the upper Kualu River area (ca. N 2°26’ E 99°32’, no. 14 in Fig 2). Again, however, the description of a large ape that moved ‘slowly and ponderously’ may suggest an adult male, and because people there are not familiar with the species, possibly a wandering male outside the range of a breeding population.

Delmont [48] described a hunting expedition on the upper Musi River, near “Sekajoe” in the foothills of the Barisan mountain range in what is now South Sumatra Province. His informant, Mr Ghoba Ramah, told him that orangutans were particularly common in the area and were raiding the crops of local farmers. After four weeks, they managed to catch seven orangutans. They then moved to a location four hours rowing upstream, where they quickly observed a female orangutan with young. They set out cages with fruit bait for capturing orangutans, but the first morning after arrival they had only managed to catch some monkeys and a pig. After that they were more successful and claimed to have caught one male orangutan and a female with young, and over the next few days they caught several more orangutans. Delmont’s stories are intriguing but strike us as somewhat fantastical, as it is unlikely that anyone could catch significant numbers of orangutans with baited cages. More likely these could be Pig-tailed Macaques, *Macaca nemestrina*, who indeed move about in groups, raid crops and can be trapped in cages. We therefore do not consider this source to be reliable.

The various historic accounts above were summarized in a map drawn by van Heurn [49] which shows that clearly the conservation community was aware of the existence of orangutans south, west and east of Lake Toba. Interestingly, though this map depicts the current Batang Toru population to be part of the range where the species had become extinct, while the only extant population is a narrow band to the east of Lake Toba in the Asahan District (Fig 1), where the species is not currently known. It suggests that information about orangutan distribution was still rudimentary in the 1930s, which may have the reason for a request to C.R. Carpenter [50] who conducted a survey on behalf of the Nederlandsch-Indische Vereeniging tot Natuurbescherming. He worked mostly in the northern parts of Sumatra and sent questionnaires to Dutch soldiers stationed in areas where orangutans could potentially occur. Carpenter assumed that orangutan did not occur south of a line drawn from Singkil to Sumatran east coast, thus overlooking much of the historic evidence of orangutans south of Lake Toba. Carpenter’s questionnaires included two reports of orangutans outside the known range. The first is from Captain H.J. Klopogge who had been based in Aceh, Siak, Indrapura and Pekanbaru (Fig 1) between 1921 and 1936, spending an average 12 days per month in the forest on patrol. He claimed to have seen orangutans “two to four” times during forest patrols, and indicated their presence on a hand-drawn map, mostly indicating



orangutan presence throughout Aceh, as well as the current Batang Toru range area. Kloprogge's reference to Siak and Pekanbaru coincides with Müller's [33] reports of orangutans in extensive forests west of Pekanbaru (see above), and might well have been accurate, indicating orangutan presence in Riau Province. Second, Captain M. Kooistra reported seeing 12 orangutans in Aceh and also indicated them to be present near Jambi (Muara Tembesi), where he had been stationed in 1925 and 1926 (Fig 1), but his descriptions and mapping don't really make clear what he had seen and where. Third, Captain H.G.C. Pel was stationed in Siak (near Pekanbaru, Fig 1) from 1933 to 1935, and reported seeing an orangutan in captivity north of the town of Talu (Fig. 2), on a tributary of the Kampar River. We consider it unlikely that such a captive orangutan in a remote village would have been transported to the area, although we cannot exclude this possibility. We map this point as likely present (no. 15 in Fig. 2)

There seems to be a gap in records between the 1930s and 1970s, but in the early 1970s, the Indonesian forester K. S. Depari reported orangutan sightings along the Batang Toru River and in the Rimbu Panti Wildlife Reserve (no. 16 in Fig 2) [16]. Borner [51] also noted that in Rimbu Panti one orangutan had been shot, while Wilson and Wilson [52] confirmed the presence of orangutans in South Tapanuli, while also reporting them around Pekanbaru, in Riau Province. Finally, the presence of orangutans was indicated by a botanist and a wildlife researcher on Gunung Talamau (no. 17 in Fig 2; Laumonier, pers. comm.). Presence in this region was confirmed by a survey in 1996 by Rijksen, Meijaard and van Schaik [13], when several nests were found on the edge of this Reserve, but follow up surveys by SW could not confirm this report and suggested that the nests may have been eagle nests. More recently, Wich et al. [53] found several orangutan nests in the peat swamp forests near Lumut (no. 5 in Fig 2) and heard a male long call in the same area. Local community members mentioned that they had also seen orangutans in the area [53]. Approximately 2 km south of the Batang Toru River (southeast of the village of Batang Toru), a geologist (Martin Jones) spotted a solitary orangutan in the forest in 2004 (no. 18 in Fig 2). Finally, Bradshaw, Isagi [54] reported on orangutans in the Barumon Wildlife Reserve in the Padang Lawas District (no. 19 in Fig 2). Nests were reportedly encountered and one staff of the local conservation department reported a direct encounter with an orangutan in 2009.

While there is significant spatial inaccuracy in the historic records of *P. tapanuliensis* outside the current range, we can still make an educated guess of the different habitats and altitudes in which these populations occurred (Table 1). Habitats in which the species once occurred included tall peat swamp forest, freshwater swamp forest mosaic and secondary forest, forest on limestone, hill forest between 300 and 1,000 a.s.l., and submontane forest between 1,000 and 1,800 m a.s.l., indicating the full range of habitats that is also used by *P. abelii* [16].

**Table 1. Orangutan records, most likely *P. tapanuliensis*, but outside the current range, that we consider to be reliable.**

| Number         | Location       | Source             | Vegetation                             | Likely status       |
|----------------|----------------|--------------------|----------------------------------------|---------------------|
| 1 <sup>a</sup> | Kampar Regency | Müller 1837        |                                        | Unclear             |
| 2              | Bukit Gedang   | Ludeking 1862      |                                        | Roaming male        |
| 3              | Tapanoeli      | Von Rosenberg 1878 | Forest 300-1000m (logged)              | Breeding population |
| 4              | Sayur Matinggi | Kramm 1879         | Limestone/Secondary Forest 300 - 1000m | Breeding population |
| 5              | Loemoet        | Kramm 1879         | Tall Peat Swamp Forest                 | Breeding population |

|    |                                |                                                           |                                  |                     |
|----|--------------------------------|-----------------------------------------------------------|----------------------------------|---------------------|
| 6  | Hadjoran                       | Neumann 1885                                              | Forest 300-1000m (Sibolangit)    | Roaming male        |
| 7  | Batang Nilo                    | L.H. 1888                                                 |                                  | Unclear             |
| 8  | Lake Maninjau                  | Twiss 1890                                                |                                  | Unclear             |
| 9  | Bukit Silajang                 | Twiss 1890                                                |                                  | Unclear             |
| 10 | West Coast                     | Hagen 1890                                                | Forest 300-1000m (logged)        | Unclear             |
| 11 | Jaga Jaga                      | Miller 1903                                               | Tall Swamp Forest (Shallow Peat) | Breeding population |
| 12 | Berdiri                        | Miller 1903                                               | Secondary Mosaic <300m           | Breeding population |
| 13 | Upland areas west of Lake Toba | Volz 1912                                                 | 1400 m                           | Breeding population |
| 14 | Kualu River                    | Volz 1912                                                 | Forest <300m                     | Roaming male        |
| 15 | Talu                           | Captain H.G.C. Pel 1935                                   |                                  | Unclear             |
| 16 | Rimbu Panti                    | Meijaard 1997                                             | Forest 300 - 1000m (Singkel)     | Unclear             |
| 17 | Talamau Mountain               | Laumonier 1983                                            | Submontane Forest 1000 - 1800m   | Unclear             |
| 5  | Lumut                          | Nests observed by Serge Wich and Tine Geurts in June 2001 | Tall Peat Swamp Forest           | Breeding population |
| 5  | Nests near Lumut               | Nests observed by Serge Wich and Tine Geurts in June 2001 | Tall Peat Swamp Forest           | Breeding population |
| 18 | South of Batang Toru           | Orangutan observed by Martin Jones (geologist) in 2004    | Secondary Mosaic <300m           | Unclear             |
| 19 | Barumon                        | Bradshaw et al. 2007                                      |                                  | Unclear             |

<sup>a</sup> Point numbers in the table correspond to the numbers in Fig 1. Vegetation information was derived from Laumonier [26].

## Discussion

### Possible drivers of historical declines

Our historical ecology analysis of *P. tapanuliensis* has indicate that the species occurred beyond its current range until quite recently. Breeding populations occurred in the Batang Gadis area (Fig 1), probably through much of today's South Tapanuli and Mandailing Natal Regencies, and further south-east in the Kampar River area. The historic records to the north of the current *P. tapanuliensis* range make it difficult to judge whether these are part of *P. abelii* or *P. tapanuliensis*. For example, the records of orangutans west of Lake Toba, could also refer to populations that still occur in the Pakpak Bharat Regency [55] and the Batu Ardan and Siranggas forest blocks in the Dairi Regency [56], which genetically are closer to *P. abelii* than *P. tapanuliensis* [57]. It is not clear whether the records in the Padang Highlands, Rimbu Panti and Padang Lawas referred to itinerant males or breeding populations but the scarcity of records could indicate that breeding populations became extinct there earlier.

Because of the uncertainties in population status (breeding or not) and taxonomy, it is not currently possible on the basis of the historic data to determine how large the former range of *P. tapanuliensis* was. We know from evidence of Late Pleistocene orangutan fossils in the Padang area (Lida Ajer, Ngala

Sampit, Ngalau Gupin) [58], that orangutans lived in this part of Sumatra at least until some 50,000 years ago. What we don't know is whether this was *P. abelii*, *P. tapanuliensis*, or a species different from both, as suggested by Drawhorn [59]. No specimens of Tapanuli Orangutan were collected by any of the historic sources, except those reported by Hagen [41] and Beccari [43], but these have not been genetically analysed yet. There is therefore no robust evidence as to whether the orangutans reported from outside the current Tapanuli Orangutan range were *P. tapanuliensis* or *P. abelii*. Further genetic study of the specimens reportedly originating from Padang (RMNH.MAM.544) and Palembang (MZUF-12), and also of fossil teeth from the Padang Caves area (e.g., through proteomic analysis) could shed light on the taxonomic status of the orangutans in Central Sumatra, and their relationship to *P. tapanuliensis*. Based on distribution range patterns, with *P. abelii* clearly restricted to the northern parts of Sumatra [12, 53], we consider it most likely that all historic orangutan populations south and south-east of the current range of *P. tapanuliensis* were indeed *P. tapanuliensis*. This would indicate that the species currently retains some 10-20% of the range it occupied some 150 to 200 years ago. As populations dwindled and encounters with orangutans became increasingly rare, this may have resulted in the folklore regarding *orang-pendek* and similar mythical creatures [28]. Our findings thus indicate that orangutans disappeared from much of their historic range, but not why the species declined and became locally extinct.

It is unclear when the populations outside the current range became extinct. Some populations such as those in Lumut, seen by Neumann in 1885 and by SW in 2001, but not seen since, may have become extinct quite recently because of forest loss. Other populations likely disappeared sometime in the 20<sup>th</sup> century. There have been no recent records from areas west or southwest of Lake Toba, nor from the Batang Gadis region, south of the current populations. Also, while there are a number of alleged records from the area east of Padang City (nos 12 and 13 in Fig 1), there are no confirmed recent records. It thus appears that a lot of these populations disappeared around a time when forests were still extensive and the commercial exploitation of forest for timber (starting in the 1970s) or their conversion to plantations (starting in the 1990s) had not yet decimated available habitats. Nevertheless, there had been significant historic deforestation prior to 1950 as shown in Fig 1, mostly for small-holder agriculture and livestock, firewood and timber, and as result of wars and fires [60, 61]. For example, the colonial-era district of *Tapanoeli* (now North, South and Central Tapanuli) had an estimated forest cover of 19000 km<sup>2</sup> in a total area of 39,481 km<sup>2</sup> (48% forested) in the 1930s [60]. In 1824, one of the first European visitors to the region was astonished to see that “the plain [north of Batang Toru] was surrounded by hills from five hundred to one thousand feet high, in a state of cultivation; and the whole surrounding country was perfectly free from wood, except the summits of two or three mountains” [62]. Some orangutan populations therefore appear to have become isolated in historic times, when early agricultural development created large grassland areas. So, why did these populations become extinct? This appears to have been a combination of habitat loss and population fragmentation, and mortality rates that exceeded reproductive replacement rates.

Several authors have suggested that orangutan density and range on both Borneo and Sumatra were primarily determined by the ability of people to access areas and hunt orangutans [63, 64]. For example, Jentink (1889) writes that orangutans in Sumatra are only common in swamp areas like those in Singkil which are so inaccessible that there are rarely “stepped on by human feet”, apparently quoting von Rosenberg [36], who had made a similar statement a decade earlier. Wallace (1869) similarly argued that orangutans were common in swamp forest, not because these were particularly suitable ecologically but rather because human hunters rarely went there. Such hunting was certainly common in the orangutan's range in Sumatra. Schneider [65], for example, writes that Batak people hunt orangutans with blow pipe, spears or shotguns, while young animals are often caught and sold to plantation owners.

Batang Gadis was populated by Loeboe people [66, p. 327] who were nomadic tribes that also occurred in Padang Lawas and “Groot-Mandailing” [67-69]. Another nomadic tribe, the Oeloes occurred around Muara Si Pongi and Pahantan (now Pakantan) [67, 70]. Similar to other nomadic people such as the Kubu

further south in Sumatra [71] or the Punan of Borneo [72], nomadic people often prefer primate meat over other meat sources. Kreemer [69] mentioned that the Loeboe people consider primate meat a delicacy. They hunted primates, including Siamang *Symphalangus syndactylus* with blowpipes, and used snares for pigs and deer. Still, there are to our knowledge no specific accounts of people from the historic range of *P. tapanuliensis* hunting and eating orangutans. Nevertheless, we consider it likely that, similar to Borneo, orangutans would have been hunted for food. Van den Burg [73], in a general account about orangutans, describes how generally orangutans were shot with poison darts, after which they fell out of the trees and were killed with spears. Alternatively, they were caught alive and killed later. The whitish meat was generally grilled over a fire, and was described as soft and sweet [73]. This is also suggested by the use in local language of *juhut bontar*, or white meat, to describe orangutan or pig-tailed macaque *Macaca nemestrina*, while such descriptions of sweet meat were similarly recorded by EM on Borneo [23]. Orangutan fat, especially from adult males, was often saved for later use in the preparation of other dishes [73]. Orangutan skins and teeth were further used as amulets on Sumatra, where people hunted them with blowpipes, spears or shotguns, although this account describes the meat as tasting “unpleasant, off-putting and bitter” [65]. We do not know the extent to which hunting and collecting for zoos by foreigners contributed to population decline for the Tapanuli orangutan, as was likely the case for the Sumatra orangutan *P. abelii* given the large number of animals that were killed and collected.[74] In conclusion, it seems likely that Tapanuli orangutans were hunted as part of people’s normal selection of big game animals, although whether off-take levels were unsustainable remains unclear.

Marshall et al. [75] examined population viability models with 1%, 2%, and 3% additional mortality in all age classes, running 500 iterations with populations of 250 orangutans. In the best quality orangutan habitats, i.e., mosaic landscapes of swamp, riparian and hill forests [23], annual hunting rates of 1% did not cause population extinction, but did decrease population size. In less than optimal habitats, e.g., forests at higher elevation, a 1% level of hunting caused declines to extinction irrespective of initial population size. Higher rates of hunting were unsustainable even in the highest quality habitats [75]. These models were conducted for Bornean orangutan *P. pygmaeus*, but the authors thought that hunting effects would be similar for Sumatran orangutans. The best orangutan habitats would like be those with the highest soil fertility, which at levels of intermediate rainfall would also be the best areas for agriculture [76]. It is thus likely that historically most Tapanuli orangutans would occur in suboptimal habitats, where the removal of one animal from a population of 100 per year, would drive such a population to extinction. Given the available information, we consider it most likely that the Tapanuli orangutan was hunted to extinction in the increasingly fragmented parts of its former range and only survived in the remote and rugged Batang Toru mountains which may have provided orangutans with a refuge from hunting.

## The biases and constraints of a historical perspective

While the use of historic data provides useful insights in the likely historic range of orangutans on Sumatra, and possible drivers of their decline and local extinction, there is uncertainty in the data. Few of the records are based on specimens that provide evidence for the veracity of claims, and some records are only based on hearsay or alleged sightings of orangutans without further evidence. While we critically examined each record, there is subjectivity in interpreting their reliability. For example, we decided not to incorporate the many records of *orang-pendek* in our analysis, even though some of them could well have referred to orangutans. Then again, we did accept sources that reported orangutans seen by local people but not the source, e.g., Neumann [38]. Had the people in Hadjoran mentioned “*orang-pendek*” rather than orangutan, we would have rejected the information, even though it would have related to the same animal. The potential bias of this approach is obvious.



Another form of bias in our study is the literature accessible to us in this study. Most of our information sources are colonial-era explorers, naturalists and hunters, for which we were able to find information in the large numbers of books, newspapers and journals that have been digitized and can be searched and accessed online. This means that we are missing out on two potentially valuable data sources: 1) Local folklore about orangutans among people that live in the orangutan's historic range; and 2) Post-independence publications and grey literature from government (e.g., forest inventories), universities (e.g., student survey reports), companies (environmental impact assessments), and local media. There is quite a lot of information about orangutan folklore from Borneo (especially Sarawak), but such information seems not to have been recorded in the anthropological literature for Sumatra. Post-independence writings from the 1950s to ca. 1980s are likely to contain many references to records of orangutans from their historic range, but such information has not yet been captured electronically and remains beyond our reach.

Future studies that would include more local and socio-culturally specific information, would put conservationists in a better position (with the help of local experts, anthropologists, etc.) to understand local drivers of extinction and formulate more targeted interventions. For example, information from indigenous groups that hunt and consume orangutans, versus conflict-related killing of orangutans, versus Muslim taboos against eating orangutans, versus groups that may or may not have specific ritual relations with orangutans [77], could result in locally specific management strategies for reducing killing, harming and capture of orangutans. There are also contextual specificities, e.g., transmigrants from Java or tsunami refugees from Nias Island having very different experiences of forest life, land rights and reactions to orangutans compared to indigenous people in the orangutan's range. All these nuances relevant to species management require that we go beyond the confines of the data sources used for the current study. There is thus value in the historical ecology approach but there are also constraints.

## Implications for species conservation

What do our findings mean for conservation? The Tapanuli orangutan's remaining three subpopulations are in apparent decline, threatened by conflict killing and hunting, and loss of lowland habitat [14, 19, 20, 78]. Our insights from past population declines, driven by habitat loss and fragmentation and probably unsustainable mortality rates, indicate that without preventing further losses to the population, even if in the single numbers per year, the last remaining populations of the species are doomed to rapidly decline within several orangutan generation lengths [estimated at 25 years, 21]. Current killing or removal rates of *P. tapanuliensis* already meet or exceed this threshold. Two wild-captured infant Tapanuli orangutan were reported thus far in 2020, with one confiscated from the owner and the other illegally released to avoid legal repercussions [79, 80]. Obtaining wild orangutan infants necessitates killing the mother in nearly all cases [23, 81], hence these infants are assumed to represent two adult females killed in the first six months of 2020 alone. Such records are indicative of a lowest minimum number of killings, as they represent only criminal acts that have been detected and acted upon, which is a fraction of the total orangutan-related wildlife crime [82, 83]. Records of an adult male killed in 2013 (OIC pers. comm. 2020), a male severely injured by humans in 2019 [84], and another male captured and translocated twice in the past 12 months due to complaints about crop raiding from local community members [85] suggest that killings have been ongoing in recent years, although prior to 2017 most detected incidents would have been recorded as *P. abelii*. While translocation has been used as a response to Tapanuli orangutans in conflict with humans, translocated animals are not monitored beyond a few days following release, and their long-term survival is not known. Behavioural traits of female site fidelity and male territoriality, and adaption issues of Bornean orangutans released in unfamiliar habitats indicate that translocation risks are high and survival rates may be low [82, 86].

Long-term protection of the Tapanuli Orangutan requires that mortality rates of <1% per year are maintained over long (decadal) time frames across the species' range. This also means that all subpopulations have to remain connected, because once connections between populations are lost this should result in higher extinction risks for the remaining subpopulations, as was modeled for Bornean orangutan *P. pygmaeus* [87]. Within the subpopulations, the prevention of killing and translocation or rescues is urgently needed, which requires innovative management of crop conflicts [88, 89], and effective law enforcement and awareness campaigns. Such campaigns have so far had insufficient impact on reducing orangutan losses and new approaches may be required [90]. This could include, for example, direct conditional payments to rural communities for maintaining habitats and preventing any deaths or harm, i.e., orangutan guardians [91] or support for "buffer gardens" to concentrate crop losses from orangutan foraging into areas acceptable to communities [92]. Viable conservation solutions that prevent the extinction of Tapanuli orangutan require an awareness of the specific problem posed by small-scale anthropogenic factors that have driven historic declines. Addressing these factors requires more targeted interventions, for example, through a conservation plan that is tailored specifically to the needs and characteristics of Tapanuli orangutans and the different socio-ecological drivers of its decline, rather than a generic national-level approach that encompasses a huge range of contexts and all three species.

Given the high extinction risks, it is important that a comprehensive plan of action is developed for the species that accurately determines how many animals remain, the level of gene flow between subpopulations, current loss rates (including removal of animals in rescues and translocations), and works towards full and permanent protection of all remaining habitat. Such a conservation management plan would need clarity about long-term funding, organizational responsibilities, and clear, science-based plan to allow the Tapanuli orangutan population to stop declining, or better, increase to safer population numbers. Without such concerted and coordinated action, the remaining populations of the Tapanuli orangutan are doomed to follow their historic predecessors on their path to rapid extinction.

## Acknowledgements

We thank Herman Rijksen for inspiring to access the historic literature on orangutans, Gabriella Fredriksson, Graham Usher, and Liana Chua for providing comments on an earlier version of this manuscript, and Matthew Minarchek for sharing Carpenter's interview data, which allowed us to update the historic range maps. We also thank XXX reviewers for their constructive comments.

## References

1. Doherty TS, Dickman CR, Nimmo DG, Ritchie EG. Multiple threats, or multiplying the threats? Interactions between invasive predators and other ecological disturbances. *Biological Conservation*. 2015;190:60-8. doi:10.1016/j.biocon.2015.05.013.
2. Kapos V, Balmford A, Aveling R, Bubb P, Carey P, Entwistle A, et al. Outcomes, not implementation, predict conservation success. *Oryx*. 2009;43(3):336-42. doi:10.1017/S0030605309990275.
3. Sutherland W. Evidence-based Conservation. *Conservation in Practice*. 2003;4(3):39-42. doi:10.1111/j.1526-4629.2003.tb00068.x.
4. Balint PJ, Stewart RE, Desai A, Walters LC. Wicked environmental problems: managing uncertainty and conflict. Washington: Island Press; 2011.
5. Game E, Meijaard E, Sheil D, McDonald-Madden E. Conservation in a wicked complex world: challenges and solutions. *Conservation Letters*. 2014;7(3):271-7. doi:10.1111/conl.12050.
6. Adams WM, Sandbrook C. Conservation, evidence and policy. *Oryx*. 2013;47(3):329-35. doi:10.1017/S0030605312001470.

7. Meijaard E, Sheil D. The Moral Minefield of Ethical Oil Palm and Sustainable Development. *Frontiers in Forests and Global Change*. 2019;2(22). doi:10.3389/ffgc.2019.00022.
8. Laurance WF, Wich SA, Onrizal O, Fredriksson G, Usher G, Santika T, et al. Tapanuli orangutan endangered by Sumatran hydropower scheme. *Nature Ecology & Evolution*. 2020. doi:10.1038/s41559-020-1263-x.
9. Gaveau DLA, Wich S, Epting J, Juhn D, Kanninen M, Leader-Williams N. The future of forests and orangutans (*Pongo abelii*) in Sumatra: predicting impacts of oil palm plantations, road construction, and mechanisms for reducing carbon emissions from deforestation. *Environmental Research Letters*. 2009;4(3):34013. doi:10.1088/1748-9326/4/3/034013.
10. Swetnam TW, Allen CD, Betancourt JL. Applied historical ecology: Using the past to manage for the future. *Ecological Applications*. 1999;9(4):1189-206. doi:10.1890/1051-0761(1999)009[1189:AHEUTP]2.0.CO;2.
11. Spehar SN, Sheil D, Harrison T, Louys J, Ancrenaz M, Marshall AJ, et al. Orangutans venture out of the rainforest and into the Anthropocene. *Science Advances*. 2018;4:e1701422. doi:10.1126/sciadv.1701422
12. Nater A, Mattle-Greminger MP, Nurcahyo A, Nowak MG, de Manuel M, Desai T, et al. Morphometric, Behavioral, and Genomic Evidence for a New Orangutan Species. *Current Biology*. 2017. doi:10.1016/j.cub.2017.09.047.
13. Meijaard E. A survey of some forested areas in South and Central Tapanuli, North Sumatra; new chances for orangutan conservation. Wageningen: Tropenbos and the Golden Ark; 1997.
14. Wich SA, Fredriksson G, Usher G, Kuhl H, Nowak M. The Tapanuli orangutan: Status, threats and steps for improved conservation. *Conservation Science and Practice*. 2019. doi:10.1111/csp2.33.
15. Wich SA, Singleton I, Nowak MG, Utami Atmoko SS, Nisam G, Arif SM, et al. Land-cover changes predict steep declines for the Sumatran orangutan (*Pongo abelii*). *Science Advances*. 2016;2(3):e1500789. doi:10.1126/sciadv.1500789
16. Rijksen HD. A fieldstudy on Sumatran orang utans (*Pongo pygmaeus abelii* Lesson 1827). Ecology, behaviour and conservation [PhD thesis]. Wageningen, The Netherlands: Agricultural University Wageningen; 1978.
17. IUCN Section on Great Apes. Batang Toru Hydropower Project. Factcheck and References on Key Issues. IUCN/SSC Primate Specialist Group; 2020.
18. Wich S, Fredriksson G, Usher G, Peters H, Priatna D, Basalamah F, et al. Hunting of Sumatran orang-utans and its importance in determining distribution and density. *Biological Conservation*. 2012;146(1):163-9.
19. Nasution A, Perwitasari-Farajallah D, Utami-Atmoko SS. Declining Orangutans Population in the Unprotected Forest of Batang Toru. *Trop Life Sci Res*. 2018;29(2):77-87. doi:10.21315/tlsr2018.29.2.6.
20. Samsuri, Surati Jaya IN, Kusmana C, Murtiلاكsono K. Connectivity and ecological indicators analysis of tropical forest landscape in Batang Toru watershed - Indonesia. *Agriculture, Forestry and Fisheries*. 2014;3(3):147-54. doi:10.11648/j.aff.20140303.12.
21. Nowak MG, Rianti P, Wich SA, Meijaard E, Fredriksson G. *Pongo tapanuliensis*. The IUCN Red List of Threatened Species 2017. 2017:e.T120588639A62. doi:10.1111/csp2.33.
22. Hooijer DA. Prehistoric teeth of man and of the orang utan from Central Sumatra, with notes on the fossil orang utan from Java and Southern China. *Zoölogische Mededelingen Rijksmuseum Leiden*. 1948;29:175 - 83.
23. Rijksen HD, Meijaard E. Our vanishing relative. The status of wild orang-utans at the close of the twentieth century. Dordrecht, The Netherlands: Kluwer Academic Publishers; 1999. 480 p.
24. Planning Department of the Forest Service. Vegetation map of Indonesia. Scale 1: 2500000. Under supervision of L.W. Hannibal. 1950.
25. ESRI. What is ArcScan?. ArcGIS Desktop. Retrieved on 17 June 2020 from <https://desktop.arcgis.com/en/arcmap/latest/extensions/arcscan/what-is-arcscan-.htm>. 2019.

- 570 26. Laumonier Y. The vegetation of Sumatra. Bogor, Indonesia: SEAMEO-BIOTROP; 1997. 154 p.
- 571 27. Schlegel H, Müller S. Bijdragen tot de natuurlijke historie van den orang-oetan (*Simia satyrus*).
- 572 In: Temminck CJ, editor. Verhandelingen over de natuurlijke geschiedenis der Nederlandsche
- 573 overzeesche bezittingen: Zoologie. Leiden, the Netherlands: Van den Koning; 1841. p. 28.
- 574 28. Jacob JC. Een merkwaardige ontmoeting op den top van den Smeroe. De Tropische Natuur.
- 575 1938;27:115-9.
- 576 29. Martyr D. The other orang. BBC Wildlife. 1993 October 1993:35 - 6.
- 577 30. Westenenk LC. Orangpandak (boschmensen) op Sumatra. Tropische Natuur. 1919;7:108- 10.
- 578 31. Dammerman KW. De Orang Pandak of Aapmensch van Sumatra. Mensch en maatschappij.
- 579 1927;3(2):76-80.
- 580 32. Radje (De) van Rokan. Interview met den radja van Rokan. De Sumatra Post. 1933;2 May 1933.
- 581 33. Müller S. Berigten over Sumatra. De Gids, afdeling Wetenschappelijke Bijdragen. **1837**;1:1-35.
- 582 34. Müller DS, Horner DL. Fragmenten uit de Reizen en Onderzoekingen in Sumatra (Vervolg van
- 583 Deel III, blz. 72). Bijdragen tot de taal-, land- en volkenkunde / Journal of the Humanities and
- 584 Social Sciences of Southeast Asia. 1855;3(1):193-228. doi:10.1163/22134379-90001160.
- 585 35. Ludeking EWA. Natuur- en Geneeskundige topographische schets der residentie Agam,
- 586 (westkust van Sumatra). Geneeskundig Tijdschrift voor Nederlandsch-Indie. 1862;4:1-153.
- 587 36. von Rosenberg H. Der Malayische Archipel. Land und Leute. Leipzig 1878.
- 588 37. Kramm W. Tochtjes in Tapanoeli. Sumatra-Courant. 1879;20(180 (Thursday 30 October)):1-2.
- 589 38. Neumann JB. Het Pane- en Bila-stroomgebied op het eiland Sumatra. Tijdschrift Nederlandsch
- 590 Aardrijkskundig Genootschap. 1885;2(II):2 and 1-133 (also III, 1-99, 215-314 & 457-543; IV, 1-
- 591 110&217-319).
- 592 39. Twiss F. Eenige opmerkingen naar aanleiding van Dr. B. Hagen's beschrijvingen der planten- en
- 593 dierenwereld van Deli. Tijdschrift van het Aardrijkskundig Genootschap. 1890:1060-3.
- 594 40. L.H. Tocht naar het rijk van Poeloe-Lawan (Sumatra's Oostkust). Onderzoek van het
- 595 stroomgebied der Battang-Nila. Tijdschrift van het binnenlandsch bestuur 1889;3:129-67.
- 596 41. Hagen B. Die Pflanzen- und Thierwelt von Deli auf der Ostkuste Sumatra's.
- 597 Naturwissenschaftliche Skizzen und Beitrage. Tijdschrift Nederlandsch Aardrijkskundig
- 598 Genootschap. 1890;7(1):1-240.
- 599 42. Miller GS. Mammals collected by Dr. W.L. Abbott on the coast and islands of northwest
- 600 Sumatra. Proceedings US National Museum, Washington. 1903;26:437-84.
- 601 43. Beccari O. Wanderings in the great forests of Borneo. From the English translation published by
- 602 Archibald Constable & Co. Ltd, London, reprinted in 1986. Oxford, UK: Oxford University
- 603 Press; 1904. 424 p.
- 604 44. Agnelli P, Becchi C, Cecconi S, Fontani S, Guimaraes S, Moggi I. Indagine storico e studio
- 605 morfometrico dell'esemplare di *Pongo pygmaeus* no MZUF 12. Museo di Storia Naturale
- 606 dell'Univerità degli Studi di Firenze. Sezione di Zoologia "La Specola"; 2002.
- 607 45. Volz W. Über die Verbreitung einiger anthropoiden Affen in Sumatra. Biologische Centralblatt.
- 608 1904;24(14):475-6.
- 609 46. Volz W. Nord-Sumatra; bericht über eine im auftrage der Humboldt-stiftung der Königlich
- 610 preussischen akademie der wissenschaften zu Berlin in den jahren 1904-1906 aufgeführte
- 611 Forschungsreise. Bd. II. Die Gajolander. Berlin: Dietrich Reimer (E. Vohsen); 1912.
- 612 47. Köhler HJ. Habinsaran. Het land van den zonnestraal. Mijn leven onder de Bataks. Zutphen: W.J.
- 613 Thieme & Cie; 1926.
- 614 48. Delmont J. Levende Natuur: Het Vangen Van Wilde Dieren. De liefde van een Orang-Oetan-
- 615 wijfje. Nieuwsblad Van Het Noorden. 1930(December 27, 1930):3.
- 616 49. van Heurn FC. De anthropoide apen, de rhinocerossen en het baardzwijn. The Netherlands:
- 617 Overgedrukt uit de Mededeeling van de Nederlandsche Commissie for Internationale
- 618 Natuurbescherming, Biologische Aanteekeningen over eenige belangrijke diersoorten van Java,
- 619 Sumatra en Borneo; 1935. Report No.: No.10 Supplement.



50. Carpenter CR. A survey of wildlife conditions in Atjeh, North Sumatra. Mededelingen Nederlandsche Commissie voor Internationale Natuurbescherming. 1938;12:1-33.
51. Borner M. Sumatra's orang-utans. Oryx 1976;13:290-3. doi:10.1017/S0030605300013752.
52. Wilson CC, Wilson WL. Behavioral and morphological variation among primate populations in Sumatra. Yearbook of Physical Anthropology. 1977;20:207-23.
53. Wich SA, Singleton I, Utami-Atmoko SS, Geurts ML, Rijksen HD, van Schaik CP. The status of the Sumatran orang-utan *Pongo abelii*: an update. Oryx. 2003;37(1):49-54. doi:10.1017/S0030605303000115.
54. Bradshaw CJA, Isagi Y, Kaneko S, Brook BW, Bowman DMJS, Frankham R. Low genetic diversity in the bottlenecked population of endangered non-native banteng in northern Australia. Molecular Ecology. 2007;16(14):2998-3008. doi:10.1111/j.1365-294X.2007.03365.x.
55. Sembiring J, Azvi TS. Estimation of orangutan populations in Sibongkaras Pakpak Bharat village forest area. Journal of Islamic Science and Technology. 2019;6(1):133-45. doi:10.22373/ekw.v6i1.5549.
56. Utami Atmoko SS, Sihite J, Nuzuar, Singleton I. Perkembangan terbaru dan sabaran orangutan sumatera (*Pongo abelii*). In: Susilo HD, Utami Atmoko SS, Sihite J, editors. Workshop Proceedings: International Workshop on Orangutan Conservation, Sanur, Bali, Indonesia 20102012. p. 105-10.
57. Nater A, Arora N, Greminger MP, van Schaik CP, Singleton I, Wich SA, et al. Marked Population Structure and Recent Migration in the Critically Endangered Sumatran Orangutan (*Pongo abelii*). Journal of Heredity. 2013;104(1):2-13. doi:10.1093/jhered/ess065.
58. Louys J, Zaim Y, Rizal Y, Aswan, Puspaningrum M, Trihascaryo A, et al. Sumatran orangutan diets in the Late Pleistocene as inferred from dental microwear texture analysis. in press.
59. Drawhorn GM. The systematics and Paleodemography of fossil Orangutans (Genus *Pongo*) [PhD Dissertation]: University of California; 1994.
60. van Steenis CGGJ. Maleische Vegetatieschetsen I: Toelichting bij de Plantengeografische Kaart van Nederlandsch Oost Indië. In: Brill EJ, editor. Tijdschrift van het Koninklijk Nederlandsch Aardrijkskundig Genootschap, Tweede Serie Deel Lii. Leiden, The Nederlandsch1935. p. 1-56.
61. Endert FH. Boschbouwkundige aantekeningen over een reis in Atjeh, Sum. Oostkust, Tapanuli en Sumatra' Westkust. Tectona. 1925;18:1-60.
62. Burton R, Ward N. Report on a journey into Batak country in the interior of Sumatra in the year 1824. Transactions of the Royal Asiatic Society. 1827;1:485-513.
63. Jentink JA. On a collection of mammals from East-Sumatra. Proceedings of the Zoological Society of London. 1889;11:17-30.
64. Wallace AR. The Malay Archipelago. reprinted in 1986 ed. Oxford: Oxford University Press; 1869. 625 p.
65. Schneider G. Ergebnisse zoologischer Forschungsreisen in Sumatra. Erster Teil. Säugetiere (Mammalia). Zoologischer Jahrbücher Abteilung für Systematik, Geographie und Biologie der Tiere. 1906;23:1-172.
66. Reitsma SA. Van Stockums's travellers' handbook for the Dutch East Indies: Van Stockum; 1930. XI, 613 p. p.
67. Joustra M. Batakspiegel: S.C. van Doesburgh; 1926. XVI, 382 p p.
68. van Dijk PALE. Rapport over de Loeboe-bevolking in de onder afdeeling Groot-Mandheling en Batang Natal. Bijdragen tot de taal-, land- en volkenkunde van Nederlandsch-Indië. 1884;8:151-61.
69. Kreemer J. De Loeboes in Mandailing. Bijdragen tot de Taal-, Land- en Volkenkunde van Nederlandsch-Indië. 1912;66:303-36.
70. Ris H. De Onderafdeeling Klein Mandailing Oeloe en Pahantan en Hare Bevolking met Uitzondering van de Oeloe's. Bijdragen tot de Taal-, Land- en Volkenkunde van Nederlandsch-Indië. 1896;46(3):441-534.

71. Veth PJ. Midden-Sumatra. Reizen en Onderzoekingen der Sumatra Expeditie 1877-1879. Derde Deel. Volksbeschrijving en Taal. Leiden: E.J. Brill; 1892.
72. Stolk JJ. Opsporing van den zwervenden stam der Penjaboeng-Poenan's, op de waterscheiding der Barito met de Mahakam en Kapoeas (Midden-Borneo), in Oct. 1905. Koninklijk Nederlands Aardrijkskundig Genootschap. 1907;24.
73. van den Burg CL. De Voeding in Nederlandsch-Indië. Amsterdam: J.H. de Bussy; 1904. 546 p.
74. Minarchek M. Plantations, Peddlers, and Nature Protection: The Transnational Origins of Indonesia's Orangutan Crisis, 1910–1930. *TRaNS: Trans -Regional and -National Studies of Southeast Asia*. 2018;6(1):101-29. doi:10.1017/trn.2017.18.
75. Marshall AJ, Lacy R, Ancrenaz M, Byers O, Husson S, Leighton M, et al. Orangutan population biology, life history, and conservation. Perspectives from population viability analysis models. In: Wich S, Atmoko SU, Mitra Setia T, van Schaik CP, editors. *Orangutans: geographic variation in behavioral ecology and conservation*. Oxford, UK: Oxford University Press; 2009. p. 311-26.
76. Santika T, Ancrenaz M, Wilson KA, Spehar S, Abram N, Banes GL, et al. First integrative trend analysis for a great ape species in Borneo. *Scientific Reports*. 2017;7(1):4839. doi:10.1038/s41598-017-04435-9.
77. Gunawan A. N. Sumatra stakeholders unite under local wisdom to protect Tapanuli orangutan. <https://www.thejakartapost.com/life/2019/11/25/n-sumatra-stakeholders-unite-under-local-wisdom-to-protect-tapanuli-orangutan.html>. The Jakarta Post. 2019;November 25, 2019.
78. Nowak MG, Rianti P, Wich SA, Meijaard E, Fredriksson G. *Pongo tapanuliensis*. The IUCN Red List of Threatened Species 2017.
79. Karokaro AS. Call for prosecution of Indonesian politician who kept baby orangutan as pet. <https://news.mongabay.com/2020/02/tapanuli-orangutan-indonesia-sumatra-official-nikson-nababan-pet/>. Mongabay. 2020(26 February 2020).
80. Pasaribu O. Anak Orangutan Tapanuli Masuk Perkampungan, Ditemukan Warga dalam Kondisi Lemah. <https://regional.kompas.com/read/2020/06/19/13323731/anak-orangutan-tapanuli-masuk-perkampungan-ditemukan-warga-dalam-kondisi>. Kompas. 2020;19 June 2020.
81. Russon AE. Orangutan rehabilitation and reintroduction. In: Wich S, Atmoko SU, Setia TM, van Schaik CP, editors. *Orangutans: Geographic variation in behavioral ecology and conservation*. Oxford, UK: Oxford University Press; 2009. p. 327-50.
82. Sherman J, Ancrenaz M, Meijaard E. Shifting apes: Conservation and welfare outcomes of Bornean orangutan rescue and release in Kalimantan, Indonesia. *Journal for Nature Conservation*. 2020;55. doi:10.1016/j.jnc.2020.125807.
83. Freund C, Rahman E, Knott C. Ten years of orangutan-related wildlife crime investigation in West Kalimantan, Indonesia. *American Journal of Primatology*. 2017;79(11):22620. doi:10.1002/ajp.22620.
84. Gunawan A. Malnourished, injured Tapanuli orangutan rehabilitated and released. <https://www.thejakartapost.com/news/2019/12/10/malnourished-injured-tapanuli-orangutan-rehabilitated-and-released.html>. The Jakarta Post. 2019;10 December 2019.
85. KSDAE. Penanganan Konflik Orangutan di Adiankoting Sumatera Utara. <http://ksdae.menlhk.go.id/info/7489/penanganan-konflik-orangutan-di-adiankoting-sumatera-utara.html>. Ministry of Environment and Forestry. 2020;16 January 2020.
86. Ancrenaz M, Oram F, Nardiyono, Silmi M, Jopony MEM, Voigt M, et al. The importance of orangutans in small fragments for maintaining metapopulation dynamics. *bioRxiv*. 2020:2020.05.17.100842. doi:10.1101/2020.05.17.100842.
87. Bruford MW, Ancrenaz M, Chikhi L, Lackman-Ancrenaz I, Andau M, Ambu L, et al. Projecting genetic diversity and population viability for the fragmented orang-utan population in the Kinabatangan floodplain, Sabah, Malaysia. *Endangered Species Research*. 2010;12:249-61. doi:10.3354/esr00295.

88. Campbell-Smith G, Campbell-Smith M, Singleton I, Linkie M. Raiders of the Lost Bark: Orangutan Foraging Strategies in a Degraded Landscape. PloSONE. 2011;6 (6):e20962. doi:10.1371/journal.pone.0020962.
89. Campbell-Smith G, Sembiring R, Linkie M. Evaluating the effectiveness of human-orangutan conflict mitigation strategies in Sumatra. Journal of Applied Ecology. 2012;49:367-75. doi:10.1111/j.1365-2664.2012.02109.x.
90. Karokaro AS, Hanafiah J. Indonesia rescues captive orangutans, but leaves their owners untouched. Mongabay. 2019 February 8 2019.
91. Schoneveld-de Lange N, Meijaard E, Löhr A. South to south learning in great ape conservation. American Journal of Primatology. 2016;78(6):669-78. doi:10.1002/ajp.22531.
92. Gehrke V. Insights from Indonesia: The Social Impact of Environmental Conservation. <https://savegorangutans.org/insights-from-indonesia-the-social-impact-of-environmental-conservation/>. GCOCP. 2020;3 August 2020.
